# Supplementary material for: Modelling structural properties of cyanine dye nanotubes at coarse-grained level
Source: Royal Society of Chemistry journal article supplement (doi:10.1039/d2na00158f), 2022-01-01
Supplement: d2na00158f1.pdf [file d2na00158f1.pdf]

# Electronic Supplementary Information (ESI) for

## Modelling structural properties of cyanine dye nanotubes at coarse-grained level

Ilias Patmanidis,<sup>a,b</sup> Paulo C. T. Souza,<sup>c</sup> Selim Sami,<sup>a,b,d</sup> Remco W. A.  
Havenith,<sup>b,d,e</sup> Alex H. de Vries,<sup>a,b</sup> Siewert J. Marrink<sup>\*a,b</sup>

<sup>a</sup> *Groningen Biomolecular Science and Biotechnology Institute, University of Groningen,  
Nijenborgh 7, Groningen 9747 AG, the Netherlands.*

<sup>b</sup> *Zernike Institute for Advanced Materials, University of Groningen, Nijenborgh 4,  
Groningen 9747 AG, The Netherlands*

<sup>c</sup> *Molecular Microbiology and Structural Biochemistry, UMR 5086 CNRS and University of  
Lyon, Lyon, France.*

<sup>d</sup> *Stratingh Institute for Chemistry, University of Groningen, Nijenborgh 4, Groningen 9747  
AG, The Netherlands*

<sup>e</sup> *Ghent Quantum Chemistry Group, Department of Chemistry, Ghent University,  
Krijgslaan 281 (S3) , B-9000 Gent, Belgium*

E-mail: s.j.marrink@rug.nl

# 1 Parameter optimisation

The bonded terms for the polymethine bridge and the partial charges of the aromatic core (C0C0) were optimised based on QM calculations. Specifically, the torsional potentials to be added to the dihedral between atoms C2-C3-C5-N9 and C4-C2-C3-C5 have been determined based on the energy difference between the QM and the MD dihedral profiles. For this purpose, models for the C0C0 (Figure 1b of the main text, where R represents hydrogen atoms) and C1C1 (Figure 1b, where R represents methyl groups) molecules were used. The atoms of these aromatic cores are the same as the C8S3 core, but the simple side chains allow us to focus solely on the polymethine bridge and the conjugated aromatic core. QM dihedral profiles were obtained by performing a relaxed scan with angle increments of 5 degrees using the Gaussian16 software<sup>1</sup>. For these scans,  $\omega$ B97xD functional with 6-311G(d,p) basis set was used. MD dihedral profiles were obtained by performing similar relaxed dihedral scans, where the existing dihedral potentials on the dihedrals of interest were removed. Then, the difference between the QM and MD profiles was fitted to a Ryckaert-Bellemans (RB) type of function, Eq. 1. The point charges for each system were generated after optimising the C0C0 and C1C1 structures with the Hartree-Fock (HF) method and 6-31G\* basis set in two different ways: Dipole Preserving Analysis (DPA)<sup>2</sup> using the GAMESS-UK software<sup>3</sup>, and Restricted Electrostatic Potential (RESP)<sup>4</sup> method using the Gaussian16 software<sup>1</sup>. The force constants for optimised MD parameters are reported in Table S1.

$$V_{RB} = \sum_{n=0}^5 C_n (\cos(\theta - 180))^n \quad (1)$$

$n$  is the number of added potentials,  $C_n$  is the RB coefficient for each potential and  $\theta$  is the dihedral angle.

| Molecule | Method  | Dihedral    | C1<br>(kJ/mol) | C2<br>(kJ/mol) | C3<br>(kJ/mol) | C4<br>(kJ/mol) | C5<br>(kJ/mol) | C6<br>(kJ/mol) |
|----------|---------|-------------|----------------|----------------|----------------|----------------|----------------|----------------|
| C0C0     | HF-DPA  | C5-C3-C2-C4 | 103.0725       | 35.0723        | -131.2985      | -26.7065       | 48.1962        | 10.6666        |
|          |         | N9-C5-C3-C2 | 57.7083        | 5.2693         | -79.2583       | -9.3074        | 23.1247        | 5.1088         |
| C0C0     | HF-RESP | C5-C3-C2-C4 | 96.3923        | 23.1281        | -134.1660      | -28.4803       | 47.4333        | 13.6272        |
|          |         | N9-C5-C3-C2 | 62.1772        | 1.8762         | -89.1708       | -3.8494        | 27.5176        | 2.0697         |
| C1C1     | HF-RESP | C5-C3-C2-C4 | 99.6354        | 26.5038        | -136.8010      | -37.0012       | 52.2696        | 22.8211        |
|          |         | N9-C5-C3-C2 | 59.4377        | 4.6123         | -85.0340       | -11.1293       | 27.2898        | 6.3321         |

**Table S1:** Force constant coefficients for RB potential functions for C0C0 and C1C1 with different methods.

It is evident that the choice of QM method affects the results and the values for the force constant coefficients show variations. However, the values are not dramatically different. Even for C0C0 and C1C1, the force constant coefficients are pretty similar. The R squared for all fitted profiles was  $\sim 0.99$ , suggesting the MD profiles are almost identical to the QM ones. An overlap of the energy profiles between the QM and MD methods for C0C0 and C1C1 is shown in Figure S1. Since the values for the RB coefficients of the dihedral angles are similar between C0C0 and C1C1, we can assume that the contribution of the substituents does not significantly affect the potentials for the rotation around the bonds of the polymethine

bridge. To maintain simplicity, the respective C0C0 force constant coefficients were used for the simulated cyanine dyes.

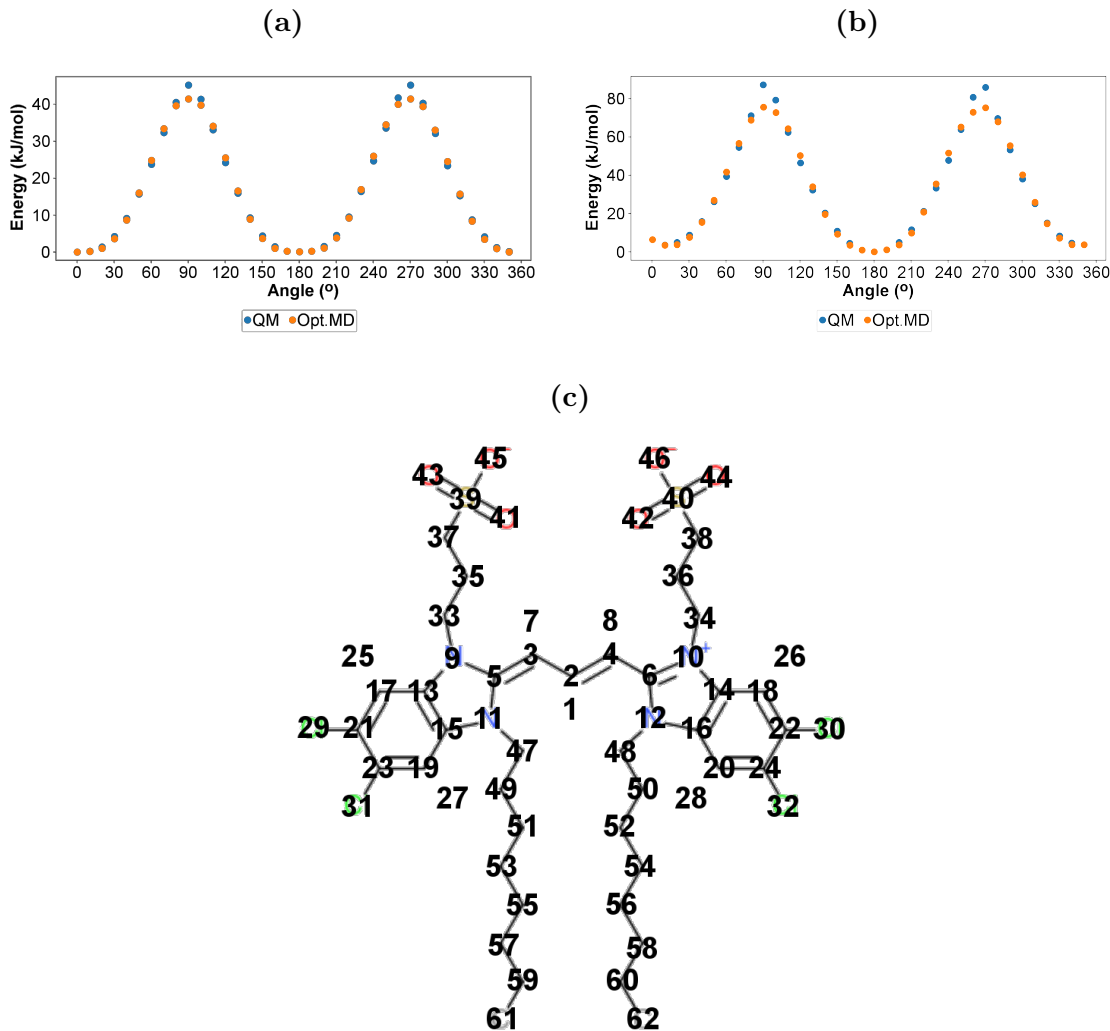

**Figure S1:** Potential energy profiles for dihedrals of C0C0 for the HF-RESP method. a) C5-C3-C2-C4. b) N9-C5-C3-C2. c) Atom index of C8S3 atomistic model. The atom numbers of the aromatic core among the generated models are identical.

After obtaining an optimal set of parameters for the dihedrals of the polymethine bridge at QM level, we compared different methods for calculating partial charges based on their ability to reproduce structural features from experimental data. Specifically, atomistic simulations of the crystal structures of two cyanine dye, C2C2<sup>5</sup> and C8O3<sup>6</sup>, were used to evaluate the performance of three different models:

- Model 1: DPA charges from QM calculations (B3LYP/6-31G\*) on C1C1 and cosinoid dihedral definitions<sup>7</sup>

- Model 2: DPA charges (HF/6-31G\*) from QM calculations ( $\omega$ B97xD/6-311G\*\*) and RB dihedral definitions
- Model 3: RESP charges (HF/6-31G\*) from QM calculations ( $\omega$ B97xD/6-311G\*\*) and RB dihedral definitions

The partial charges for each model of C2C2 and C8O3 are reported in Tables S2-S3.

| Atom | Model 1 | Model 2 | Model 3 |
|------|---------|---------|---------|
| H1   | 0.030   | 0.133   | 0.224   |
| C2   | -0.030  | -0.017  | 0.148   |
| C3   | -0.250  | -0.448  | -0.606  |
| C4   | -0.250  | -0.448  | -0.606  |
| C5   | 0.660   | 0.852   | 0.406   |
| C6   | 0.660   | 0.852   | 0.406   |
| H7   | 0.030   | 0.116   | 0.248   |
| H8   | 0.030   | 0.116   | 0.248   |
| N9   | -0.390  | -0.539  | -0.169  |
| N10  | -0.390  | -0.539  | -0.169  |
| N11  | -0.390  | -0.539  | -0.169  |
| N12  | -0.390  | -0.539  | -0.169  |
| C13  | 0.280   | 0.334   | 0.094   |
| C14  | 0.280   | 0.334   | 0.094   |
| C15  | 0.280   | 0.334   | 0.094   |
| C16  | 0.280   | 0.334   | 0.094   |
| C17  | -0.160  | -0.227  | -0.220  |
| C18  | -0.160  | -0.227  | -0.220  |
| C19  | -0.160  | -0.227  | -0.220  |
| C20  | -0.160  | -0.227  | -0.220  |
| C21  | 0.020   | 0.014   | 0.072   |
| C22  | 0.020   | 0.014   | 0.072   |
| C23  | 0.020   | 0.014   | 0.072   |
| C24  | 0.020   | 0.014   | 0.072   |
| H25  | 0.110   | 0.170   | 0.191   |
| H26  | 0.110   | 0.170   | 0.191   |
| H27  | 0.110   | 0.170   | 0.191   |
| H28  | 0.110   | 0.170   | 0.191   |

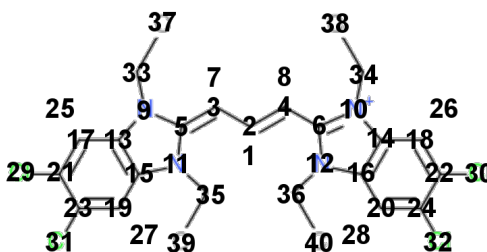

| Atom | Model 1 | Model 2 | Model 3 |
|------|---------|---------|---------|
| CL29 | -0.030  | -0.055  | -0.065  |
| CL30 | -0.030  | -0.055  | -0.065  |
| CL31 | -0.030  | -0.055  | -0.065  |
| CL32 | -0.030  | -0.055  | -0.065  |
| C33  | 0.200   | 0.264   | 0.206   |
| C34  | 0.200   | 0.264   | 0.206   |
| C35  | 0.200   | 0.264   | 0.206   |
| C36  | 0.200   | 0.264   | 0.206   |
| C37  | 0.0     | 0.0     | 0.024   |
| C38  | 0.0     | 0.0     | 0.024   |
| C39  | 0.0     | 0.0     | 0.024   |
| C40  | 0.0     | 0.0     | 0.024   |

**Table S2:** Partial charges for different C2C2 models.

The structural features of the crystal structures that were evaluated were the dimensions of the supercell (simulation box) and its density. Additionally, the root-mean-square deviation (RMSD) from the initial conformation and the position of the first peak in Radial Distribution Function (RDF) calculations are reported. The results from the crystal simulations are reported in Table S4.

In general, even though the differences are quite small, the models with HF-RESP charges performed better in terms of maintaining the structural properties of the cyanine crystal structures. Model 1 performed worse than the others, especially in the C8O3 crystal. The

results for Model 2 and Model 3 are quite similar, but Model 3 reproduced slightly better the position of the first peak in the RDF calculation. The parameters of Model 3 were used for the atomistic simulations of the C8S3 monomer in water. The partial charges for C8S3 are reported in Table S5.

| Atom | Model 1 | Model 2 | Model 3 |
|------|---------|---------|---------|
| H1   | 0.030   | 0.166   | 0.21    |
| C2   | -0.030  | -0.006  | 0.133   |
| C3   | -0.250  | -0.499  | -0.562  |
| C4   | -0.250  | -0.499  | -0.562  |
| C5   | 0.660   | 0.902   | 0.420   |
| C6   | 0.660   | 0.902   | 0.420   |
| H7   | 0.030   | 0.164   | 0.282   |
| H8   | 0.030   | 0.164   | 0.282   |
| N9   | -0.390  | -0.565  | -0.185  |
| N10  | -0.390  | -0.565  | -0.185  |
| N11  | -0.390  | -0.565  | -0.185  |
| N12  | -0.390  | -0.565  | -0.185  |
| C13  | 0.280   | 0.338   | 0.112   |
| C14  | 0.280   | 0.338   | 0.112   |
| C15  | 0.280   | 0.338   | 0.112   |
| C16  | 0.280   | 0.338   | 0.112   |
| C17  | -0.160  | -0.224  | -0.234  |
| C18  | -0.160  | -0.224  | -0.234  |
| C19  | -0.160  | -0.224  | -0.234  |
| C20  | -0.160  | -0.224  | -0.234  |
| C21  | 0.020   | 0.011   | 0.067   |
| C22  | 0.020   | 0.011   | 0.067   |
| C23  | 0.020   | 0.011   | 0.067   |
| C24  | 0.020   | 0.011   | 0.067   |
| H25  | 0.110   | 0.159   | 0.188   |
| H26  | 0.110   | 0.159   | 0.188   |
| H27  | 0.110   | 0.159   | 0.188   |
| H28  | 0.110   | 0.159   | 0.188   |
| CL29 | -0.030  | -0.085  | -0.094  |
| CL30 | -0.030  | -0.085  | -0.094  |
| CL31 | -0.030  | -0.085  | -0.094  |
| CL32 | -0.030  | -0.085  | -0.094  |
| C33  | 0.200   | 0.215   | 0.120   |
| C34  | 0.200   | 0.215   | 0.120   |
| C35  | 0.0     | 0.069   | 0.0     |
| C36  | 0.0     | 0.022   | 0.044   |
| C37  | -0.080  | -0.062  | 0.019   |
| C38  | 0.120   | -0.124  | -0.093  |
| C39  | 0.640   | 0.918   | 0.865   |
| C40  | 0.600   | 0.877   | 0.878   |

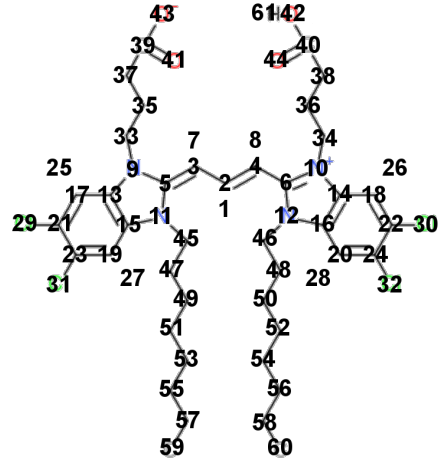

| Atom | Model 1 | Model 2 | Model 3 |
|------|---------|---------|---------|
| O41  | -0.780  | -0.722  | -0.782  |
| O42  | -0.610  | -0.784  | -0.682  |
| O43  | -0.780  | -0.722  | -0.782  |
| O44  | -0.570  | -0.685  | -0.651  |
| C45  | 0.200   | 0.192   | 0.120   |
| C46  | 0.200   | 0.192   | 0.120   |
| C47  | 0.0     | 0.031   | 0.089   |
| C48  | 0.0     | 0.031   | 0.089   |
| C49  | 0.0     | -0.007  | -0.001  |
| C50  | 0.0     | -0.007  | -0.001  |
| C51  | 0.0     | 0.017   | 0.035   |
| C52  | 0.0     | 0.017   | 0.035   |
| C53  | 0.0     | 0.0     | -0.009  |
| C54  | 0.0     | 0.01    | -0.009  |
| C55  | 0.0     | 0.016   | -0.002  |
| C56  | 0.0     | 0.016   | -0.002  |
| C57  | 0.0     | 0.05    | 0.062   |
| C58  | 0.0     | 0.05    | 0.062   |
| C59  | 0.0     | -0.05   | -0.068  |
| C60  | 0.0     | -0.05   | -0.068  |
| H61  | 0.460   | 0.455   | 0.453   |

**Table S3:** Partial charges for different C8O3 models.

| Molecule | Analysis                     | Reference | Model 1 |       | Model 2 |       | Model 3 |       |
|----------|------------------------------|-----------|---------|-------|---------|-------|---------|-------|
|          |                              |           | Average | Error | Average | Error | Average | Error |
| C2C2     | X (nm)                       | 4.012     | 4.218   | 0.001 | 3.989   | 0.001 | 4.003   | 0.003 |
|          | Y (nm)                       | 3.310     | 3.444   | 0.001 | 3.480   | 0.001 | 3.426   | 0.001 |
|          | Z (nm)                       | 6.451     | 6.015   | 0.001 | 6.127   | 0.001 | 6.160   | 0.001 |
|          | Density (kg/m <sup>3</sup> ) | 1442      | 1470.09 | 0.17  | 1510.11 | 0.41  | 1520.69 | 0.21  |
|          | RMSD (nm)                    |           | 0.311   |       | 0.187   |       | 0.118   |       |
|          | RDF (nm)                     | 0.868     | 0.807   |       | 0.883   |       | 0.875   |       |
| C8O3     | X (nm)                       | 4.974     | 5.326   | 0.004 | 4.925   | 0.001 | 4.999   | 0.006 |
|          | Y (nm)                       | 4.682     | 5.184   | 0.008 | 4.765   | 0.001 | 4.695   | 0.003 |
|          | Z (nm)                       | 5.201     | 4.422   | 0.005 | 5.131   | 0.002 | 5.141   | 0.008 |
|          | Density (kg/m <sup>3</sup> ) | 1254      | 1245.19 | 0.56  | 1262.47 | 0.23  | 1260.11 | 0.50  |
|          | RMSD (nm)                    |           | 1.081   |       | 0.877   |       | 0.885   |       |
|          | RDF (nm)                     | 0.420     | 0.487   |       | 0.453   |       | 0.418   |       |

**Table S4:** Summary of crystal simulations analysis. Different structural features of the simulated systems are compared with the initial values of the crystal structure<sup>5,6</sup>. The RMSD is calculated for every atom of the cyanine dyes. The RDF value refers to the position of the first peak for the distribution of the central atom of the cyanine core (C2). The error is calculated based on block averages over 5 blocks. The cells of the table are coloured based on the value of the simulated feature compared to the initial value. Green colour indicates that the reported value is  $\pm 1-2\%$  of the initial value. Yellow represents  $\pm 2-5\%$ , orange  $\pm 5-10\%$  and red  $>10\%$ .

|      |         |      |         |      |         |      |         |
|------|---------|------|---------|------|---------|------|---------|
| Atom | Model 3 |
| H1   | 0.020   | C17  | -0.205  | C33  | 0.118   | C49  | 0.050   |
| C2   | 0.462   | C18  | -0.205  | C34  | 0.118   | C50  | 0.050   |
| C3   | -0.691  | C19  | -0.205  | C35  | 0.099   | C51  | -0.045  |
| C4   | -0.691  | C20  | -0.205  | C36  | 0.099   | C52  | -0.045  |
| C5   | 0.538   | C21  | 0.067   | C37  | -0.065  | C53  | -0.087  |
| C6   | 0.538   | C22  | 0.067   | C38  | -0.065  | C54  | -0.087  |
| H7   | 0.246   | C23  | 0.067   | S39  | 1.324   | C55  | 0.106   |
| H8   | 0.246   | C24  | 0.067   | S40  | 1.324   | C56  | 0.106   |
| N9   | -0.221  | H25  | 0.189   | O41  | -0.706  | C57  | -0.026  |
| N10  | -0.221  | H26  | 0.189   | O42  | -0.706  | C58  | -0.026  |
| N11  | -0.221  | H27  | 0.189   | O43  | -0.706  | C59  | 0.074   |
| N12  | -0.221  | H28  | 0.189   | O44  | -0.706  | C60  | 0.074   |
| C13  | 0.100   | CL29 | -0.109  | O45  | -0.706  | C61  | -0.089  |
| C14  | 0.100   | CL30 | -0.109  | O46  | -0.706  | C62  | -0.089  |
| C15  | 0.100   | CL31 | -0.109  | C47  | 0.183   |      |         |
| C16  | 0.100   | CL32 | -0.109  | C48  | 0.183   |      |         |

**Table S5:** Partial charges used for the C8S3 molecule.

## 2 C8S3 nanotube structures

| System | No C8S3 | Inner radius<br>PMB<br>(nm) | Inner rolling<br>angle (°) | Outer radius<br>PMB<br>(nm) | Outer rolling<br>angle (°) | Simulation<br>time (ns) | Length<br>(nm) |
|--------|---------|-----------------------------|----------------------------|-----------------------------|----------------------------|-------------------------|----------------|
| 1      | 3626    | 3.72                        | 30.96                      | 5.49                        | 31.53                      | 1000                    | 50             |
| 2      | 3795    | 3.96                        | 42.11                      | 5.59                        | 41.99                      | 1000                    | 50             |
| 3      | 4350    | 4.90                        | 41.87                      | 6.64                        | 42.88                      | 1000                    | 50             |
| 4      | 4883    | 5.31                        | 32.73                      | 7.08                        | 32.73                      | 1000                    | 50             |
| 5      | 6071    | 6.84                        | 36.01                      | 8.57                        | 32.42                      | 1000                    | 50             |
| 6H     | 3626    | 3.72                        | 30.96                      | 5.49                        | 31.53                      | 500                     | 50             |
| 7B     | 16042   | 3.72                        | 30.96                      | 5.49                        | 31.53                      | 1000                    | 50             |

**Table S6:** Initial parameters for the preparation of C8S3 nanotubes simulations. H stands for herringbone and B stands for bundle.

## 3 C8S3 coarse-grained model

In Martini 3, the mapping of aromatic moieties is based on the centre of geometry of all atoms (heavy and hydrogen atoms) that participate in each chemical group. However, this rule is slightly flexible, since parametrization aims at optimising the surface area of the molecules, and different definitions can be used to maintain the overall shape. In the C8S3 model, constraints hold together the aromatic rings, whereas bonds connect the polymethine bridge with the benzimidazoles, Figures S2 and S4. Each benzimidazole ring is constituted by four normal beads, one virtual site at their centre of geometry and one dummy particle. Virtual sites have no mass, so the mass of the respective bead has been evenly distributed to the four normal beads. In contrast to virtual sites, dummy particles do not interact via non-bonded interactions with any bead, and only act as supportive particles to allow specific conformations. The angles and dihedrals that control the orientation of the aromatic core are presented in Figures S3, S5 and S6. There were no angles between the side chains and the central bead to allow free rotation around the defined axis. No dihedral definitions were used between the core and side chains, since the angle definitions were sufficient to describe the movement of the side chains. Finally, the aromatic core of these cyanine dyes is positively charged. The extra charge was assigned to the beads that represent atoms of the polymethine chain.

The solvent accessible surface area (SASA) was calculated for the atomistic and the CG model, in order to compare the final size of the models. The initial mapping underestimated the volume of the aromatic core. Overlapping the volume of the atomistic and CG models revealed that the area around the chlorines was slightly smaller in the initial CG models (Model 1). Consequently, the mapping was modified to increase the overlap of the two surfaces. Instead of mapping the SX3 bead on the centre of geometry of the CHCl group (Model 1), the bead was placed at the centre of the C-Cl bond (Model 2). The surface of the aromatic core with the new mapping is almost identical to the atomistic value, Figure S7b.



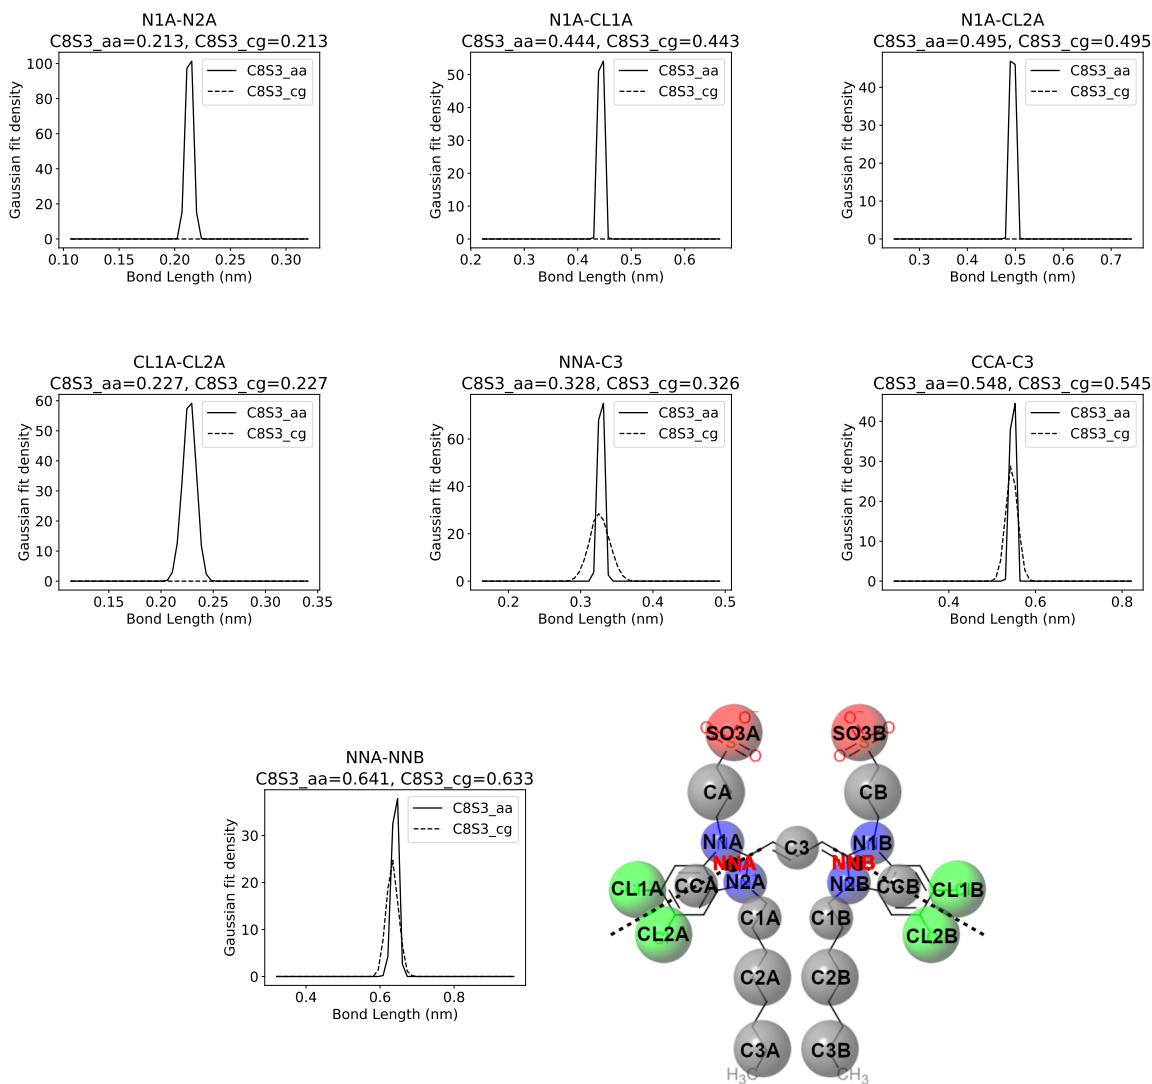

**Figure S2:** Comparison of atomistic and CG bond length distributions for the aromatic core of C8S3.

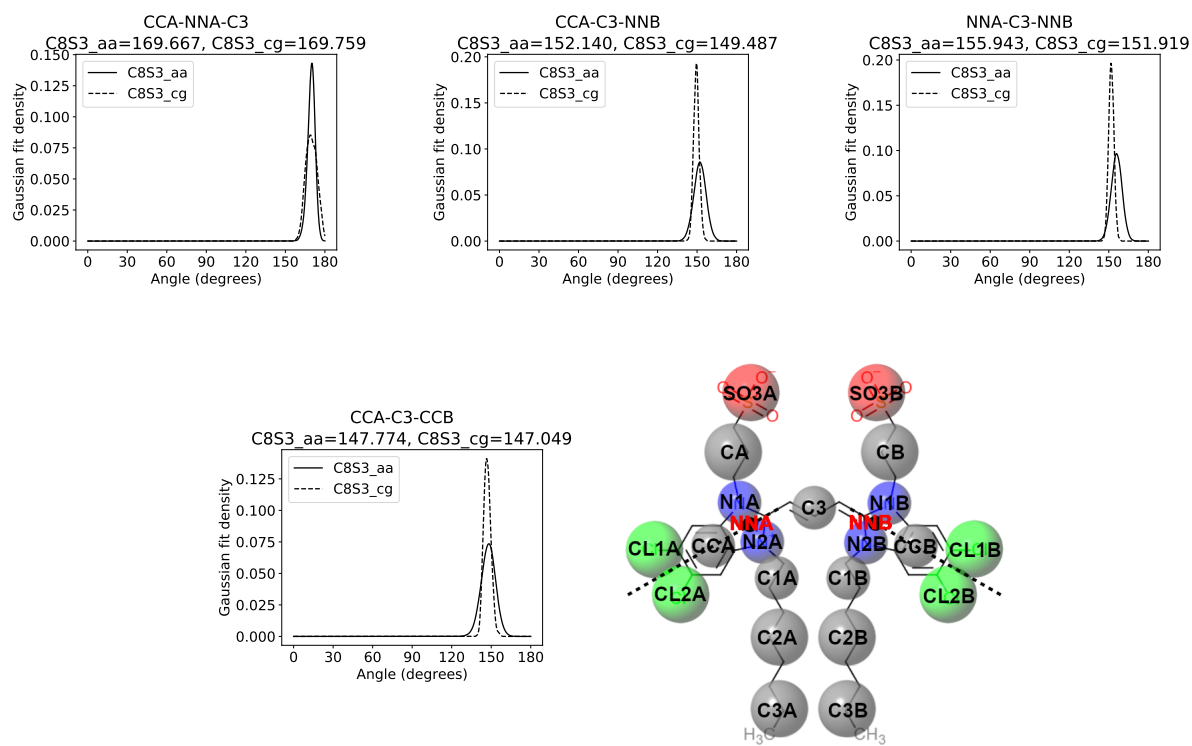

**Figure S3:** Comparison of atomistic and CG angle distributions for the aromatic core of C8S3.

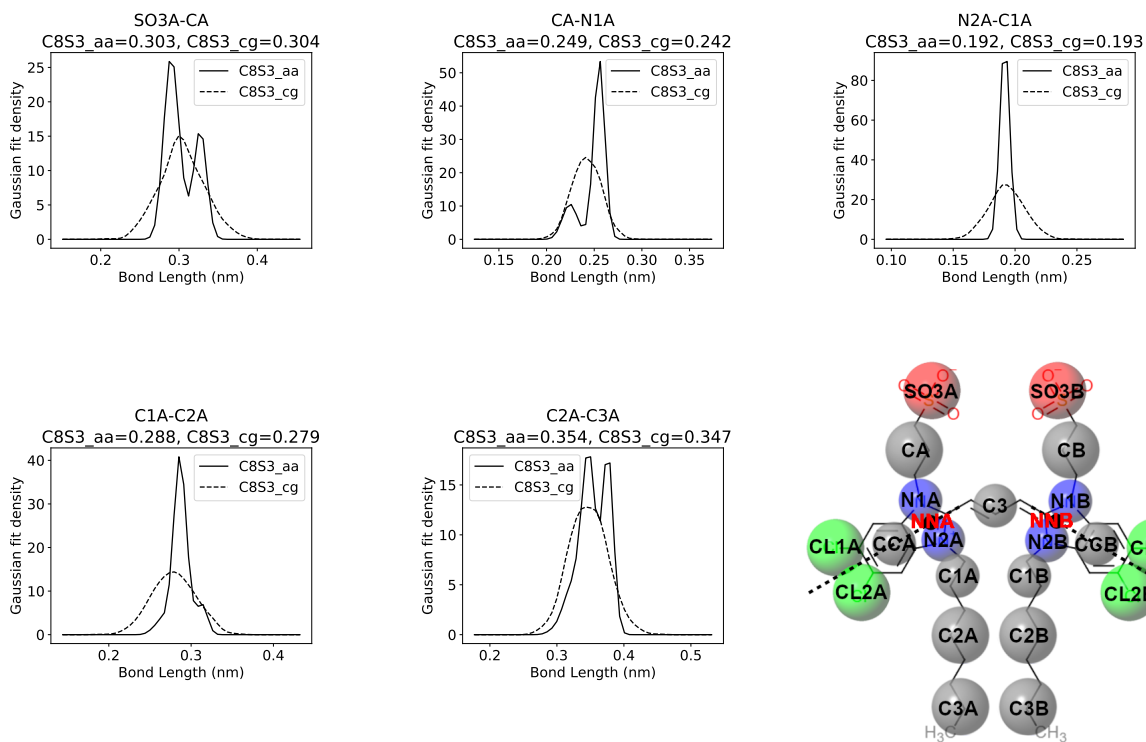

**Figure S4:** Comparison of atomistic and CG bond length distributions for the tails of C8S3.

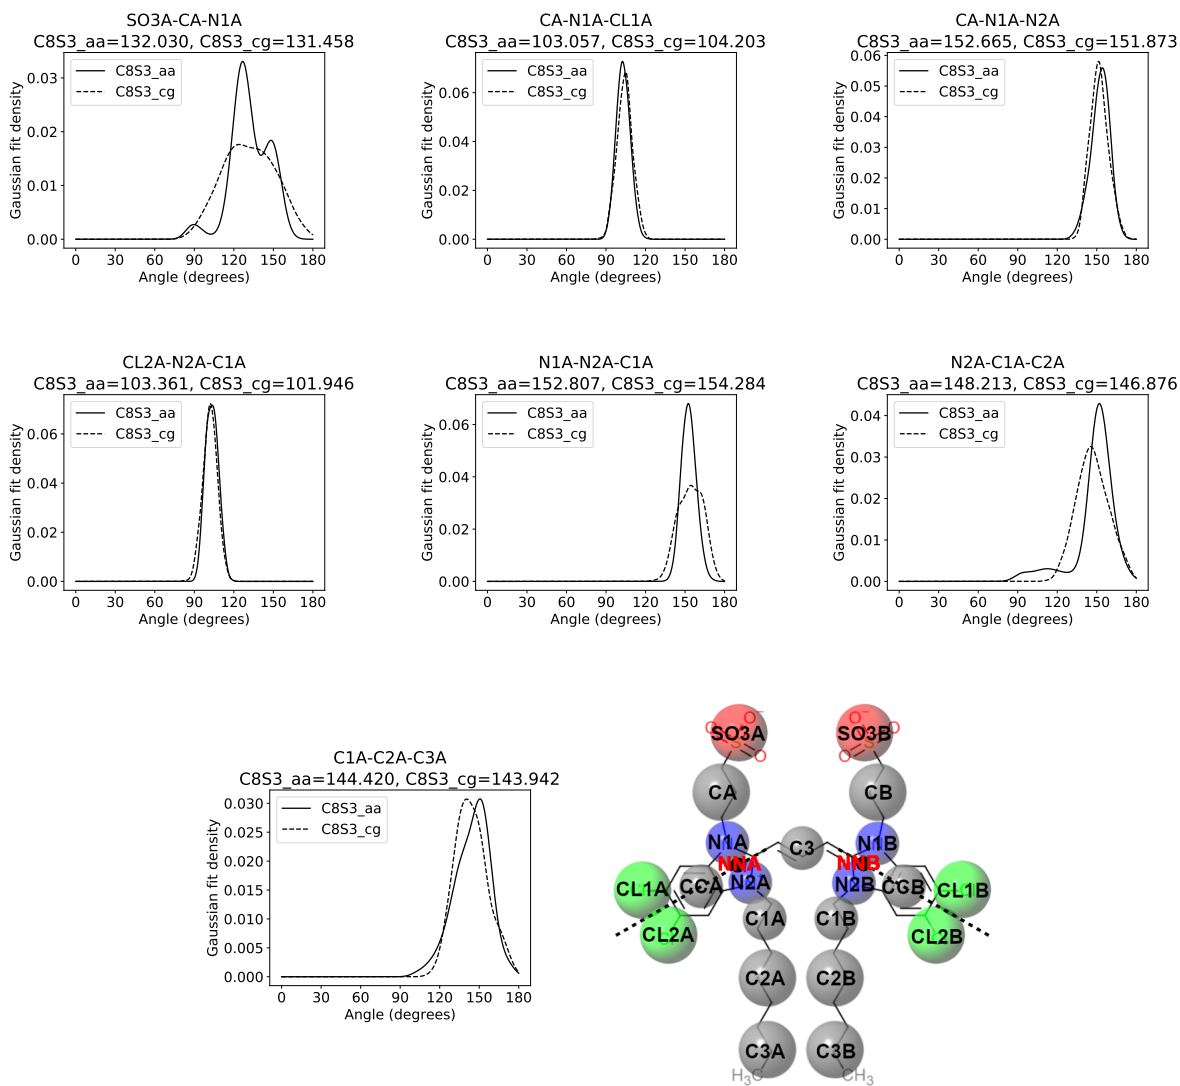

**Figure S5:** Comparison of atomistic and CG angle distributions for the tails of C8S3.

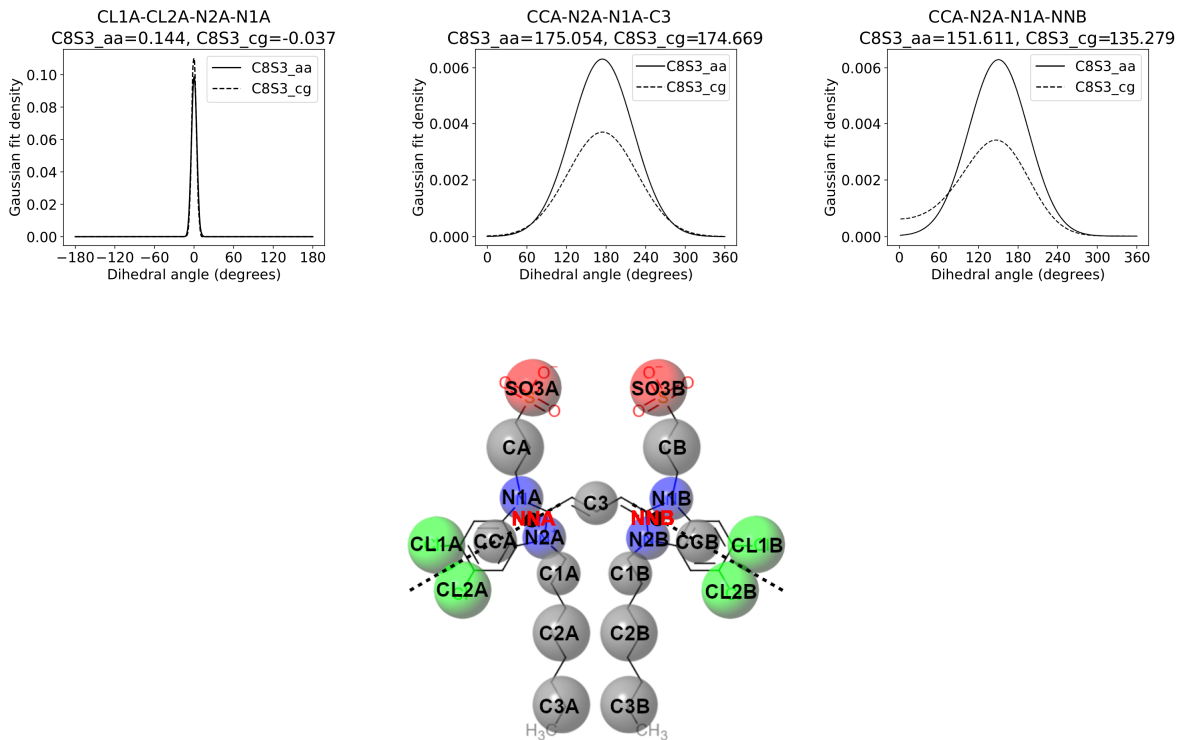

**Figure S6:** Comparison of atomistic and CG dihedal distributions for C2C2.

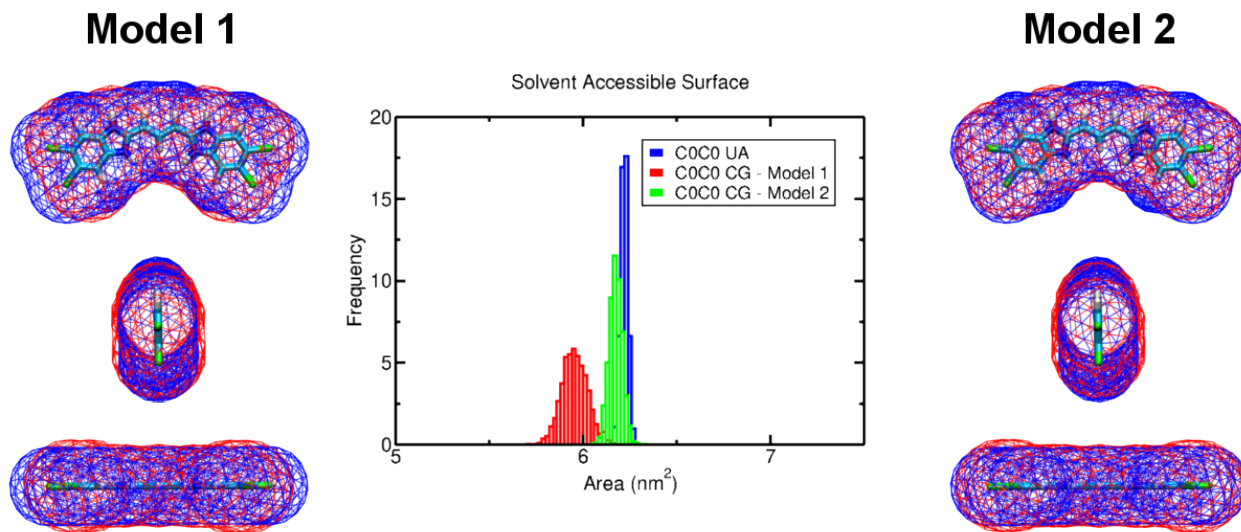

**Figure S7:** Solvent accessible surface area for the aromatic core of the C8S3 molecule. The histograms represent the SASA for one monomer in solution for a trajectory of 100 ns. The number of dots for SASA in the histogram analysis was set to 10000, whereas for the surface representation the number of dots were 50.

## 4 Self-assembly of C8S3

| System | No C8S3 | No Na | No W   | Box size (nm) | Simulation time ( $\mu$ s) |
|--------|---------|-------|--------|---------------|----------------------------|
| 1      | 50      | 50    | 7329   | 10x10x10      | 10                         |
| 2      | 100     | 100   | 6726   | 10x10x10      | 10                         |
| 3      | 500     | 500   | 58309  | 20x20x20      | 10                         |
| 4      | 1000    | 1000  | 114828 | 25x25x25      | 10                         |

**Table S7:** System details for random self-assembly simulations.

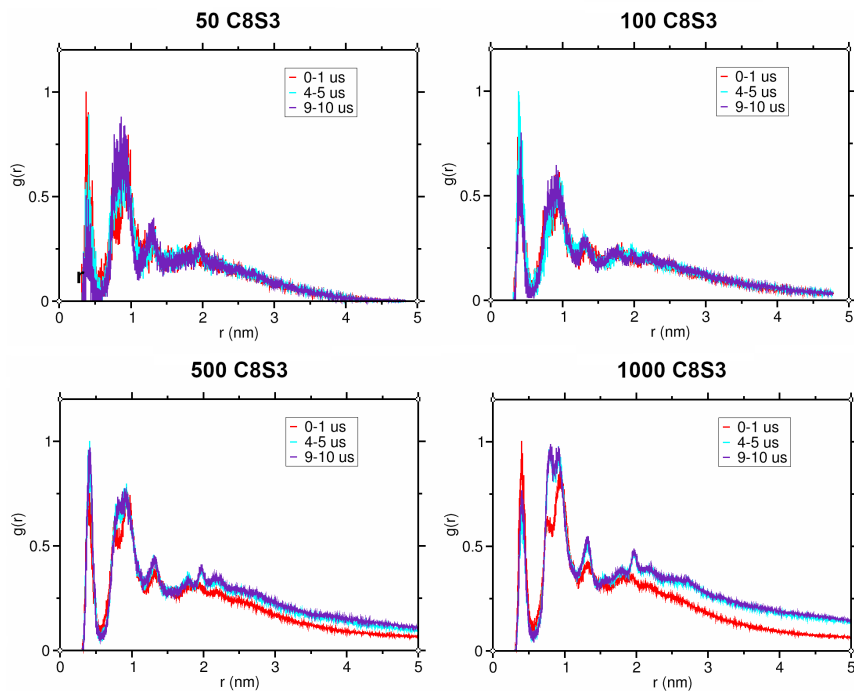

**Figure S8:** RDF calculations for different time frames of each simulated system.

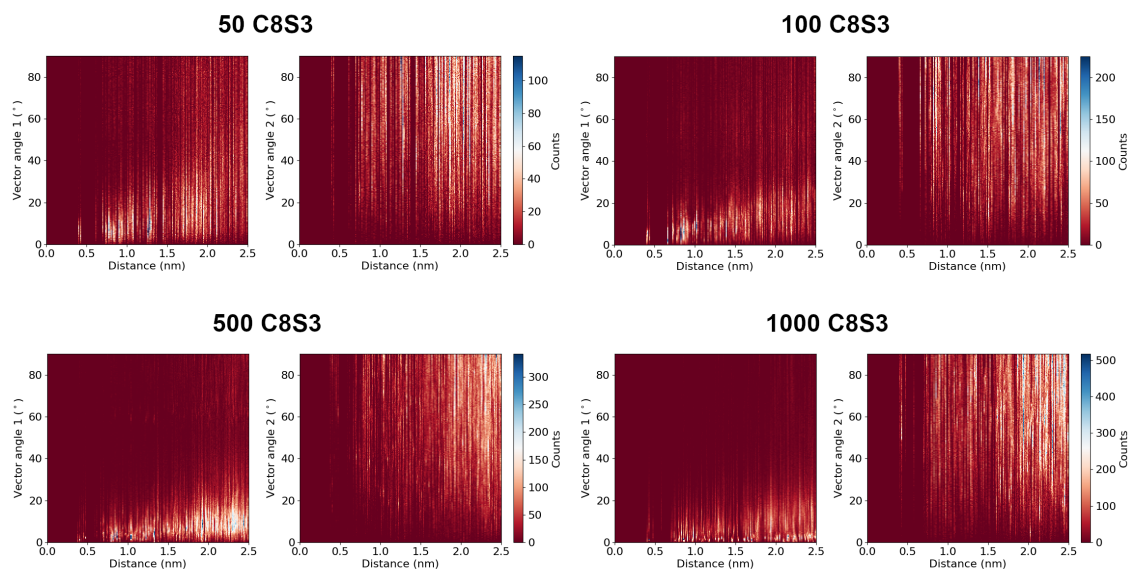

**Figure S9:** Relative orientation analysis for each simulated system.



## 5 Simulations of preformed C8S3 structures

| System | Inner radius (nm) | Outer radius (nm) | Thickness (nm)  |
|--------|-------------------|-------------------|-----------------|
| 1      | $3.07 \pm 0.36$   | $5.52 \pm 0.31$   | $2.47 \pm 0.07$ |
| 2      | $3.40 \pm 0.39$   | $5.85 \pm 0.36$   | $2.47 \pm 0.15$ |
| 3      | $4.01 \pm 0.41$   | $6.47 \pm 0.38$   | $2.48 \pm 0.04$ |
| 4      | $4.57 \pm 0.39$   | $7.05 \pm 0.35$   | $2.48 \pm 0.05$ |
| 5      | $6.02 \pm 0.41$   | $8.51 \pm 0.38$   | $2.49 \pm 0.08$ |

**Table S8:** Final dimensions of C8S3 nanotube simulations (mean values and standard deviations).

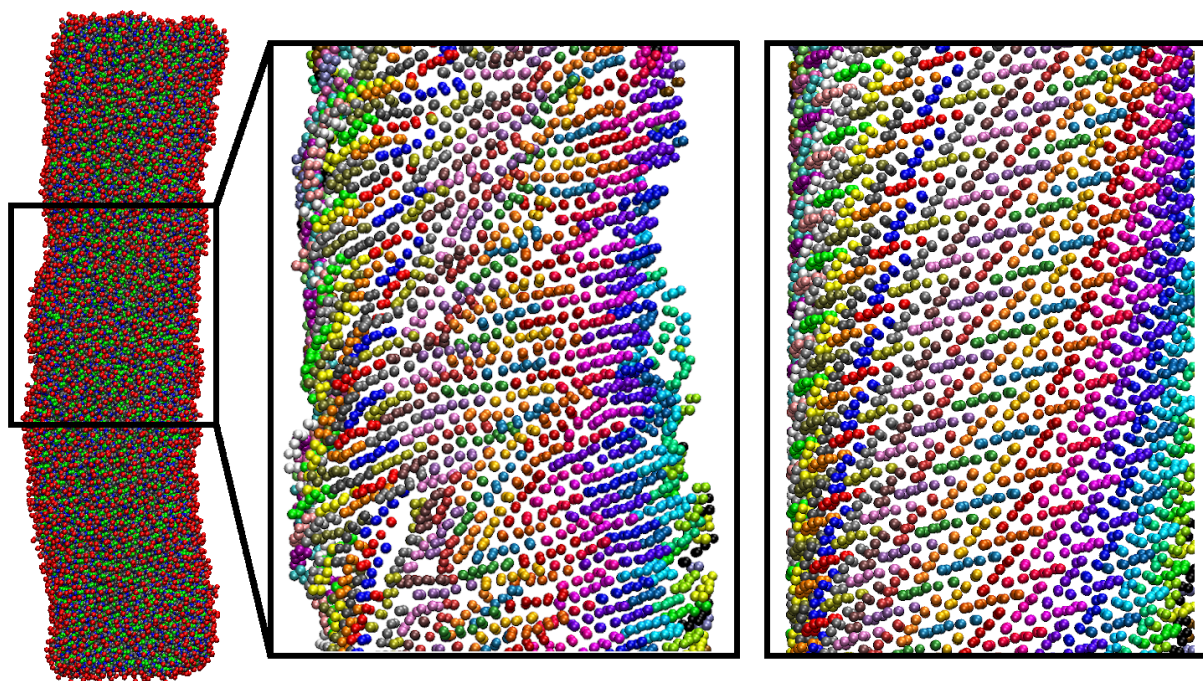

**Figure S10:** Snapshots from a C8S3 nanotube simulation with the herringbone arrangement after 500 ns in the production phase (left panel). Initial arrangement of C8S3 molecules (right panel).



## 6 C8S3 bundle preparation

The C8S3 bundle construction can be summarised in following steps: i) preparation of a single C8S3 nanotube (System 1), ii) replication of the single nanotube and translation of the nanotubes' position until the optimal thickness (2.5 nm) is achieved, and iii) removal of the overlapping C8S3 molecules of the outer wall.

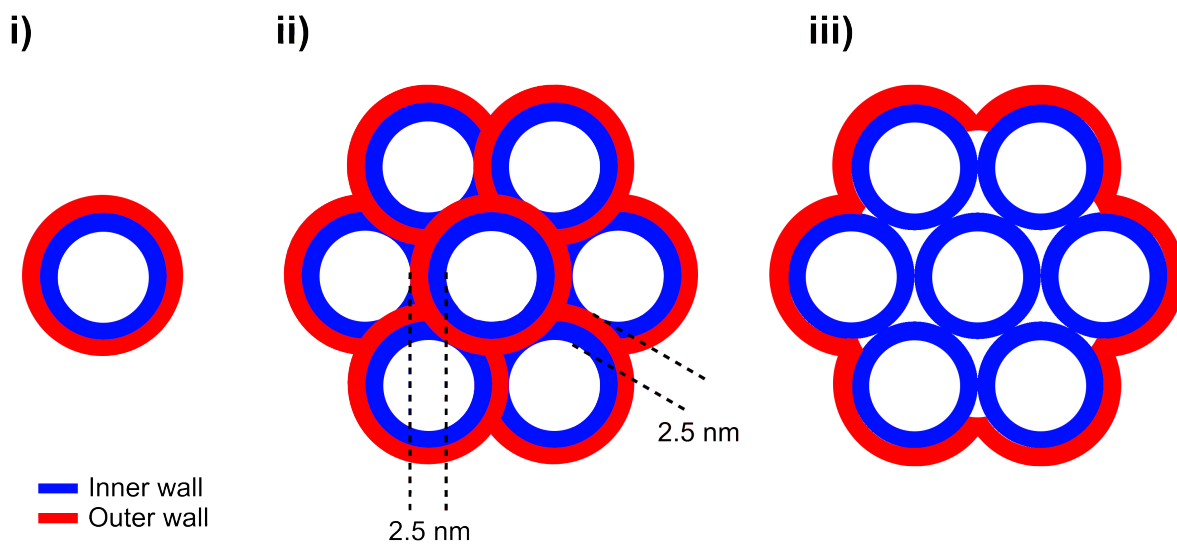

**Figure S11:** Schematic representation of the C8S3 bundle preparation.

## References

- [1] M. J. Frisch, G. W. Trucks, H. B. Schlegel, G. E. Scuseria, M. A. Robb, J. R. Cheeseman, G. Scalmani, V. Barone, G. A. Petersson, H. Nakatsuji, X. Li, M. Caricato, A. V. Marenich, J. Bloino, B. G. Janesko, R. Gomperts, B. Mennucci, H. P. Hratchian, J. V. Ortiz, A. F. Izmaylov, J. L. Sonnenberg, D. Williams-Young, F. Ding, F. Lipparini, F. Egidi, J. Goings, B. Peng, A. Petrone, T. Henderson, D. Ranasinghe, V. G. Zakrzewski, J. Gao, N. Rega, G. Zheng, W. Liang, M. Hada, M. Ehara, K. Toyota, R. Fukuda, J. Hasegawa, M. Ishida, T. Nakajima, Y. Honda, O. Kitao, H. Nakai, T. Vreven, K. Throssell, J. A. Montgomery, Jr., J. E. Peralta, F. Ogliaro, M. J. Bearpark, J. J. Heyd, E. N. Brothers, K. N. Kudin, V. N. Staroverov, T. A. Keith, R. Kobayashi, J. Normand, K. Raghavachari, A. P. Rendell, J. C. Burant, S. S. Iyengar, J. Tomasi, M. Cossi, J. M. Millam, M. Klene, C. Adamo, R. Cammi, J. W. Ochterski, R. L. Martin, K. Morokuma, O. Farkas, J. B. Foresman and D. J. Fox, *Gaussian 16 Revision A.03*, 2016, Gaussian Inc. Wallingford CT.
- [2] B. T. Thole and P. T. van Duijnen, *Theoretica chimica acta*, 1983, **63**, 209–221.
- [3] M. F. Guest\*, I. J. Bush, H. J. J. Van Dam, P. Sherwood, J. M. H. Thomas, J. H. Van Lenthe, R. W. A. Havenith and J. Kendrick, *Molecular Physics*, 2005, **103**, 719–747.
- [4] C. I. Bayly, P. Cieplak, W. Cornell and P. A. Kollman, *The Journal of Chemical Physics*, 1993, **97**, 10269–10280.
- [5] D. L. Smith and H. R. Luss, *Acta Crystallographica B*, 1972, **28**, 2793–2806.
- [6] S. Kirstein, H. von Berlepsch, C. Böttcher, C. Burger, A. Quart, G. Reck and S. Dähne, *ChemPhysChem*, 2000, **1**, 146–150.
- [7] I. Patmanidis, A. H. de Vries, T. A. Wassenaar, W. Wang, G. Portale and S. J. Marrink, *Phys. Chem. Chem. Phys.*, 2020, **22**, 21083–21093.
